# Supplementary material for: Validation of a cross-NTD toolkit for assessment of NTD-related morbidity and disability. A cross-cultural qualitative validation of study instruments in Colombia
Source: PLOS journal article supplement (doi:10.1371/journal.pone.0223042), 2019-12-03
Supplement: S16 (10.1371/journal.pone.0223042.s016) [file journal.pone.0223042.s016]

## S12 Appendix. COREQ-checklist and Research group.

Consolidated criteria for reporting qualitative studies (COREQ): 32-item checklist.

| No. Item                                       | Guide questions/description                                                                                                                | Reported on Page # |
|------------------------------------------------|--------------------------------------------------------------------------------------------------------------------------------------------|--------------------|
| <b>Domain 1: Research team and reflexivity</b> |                                                                                                                                            |                    |
| <i>Personal Characteristics</i>                |                                                                                                                                            |                    |
| 1. Inter viewer/facilitator                    | Which author/s conducted the inter view or focus group?                                                                                    | Page 12            |
| 2. Credentials                                 | What were the researcher's credentials?<br>E.g. PhD, MD                                                                                    | Appendix 12        |
| 3. Occupation                                  | What was their occupation at the time of the study?                                                                                        | Appendix 12        |
| 4. Gender                                      | Was the researcher male or female?                                                                                                         | Appendix 12        |
| 5. Experience and training                     | What experience or training did the researcher have?                                                                                       | Page 12            |
| <i>Relationship with participants</i>          |                                                                                                                                            |                    |
| 6. Relationship established                    | Was a relationship established prior to study commencement?                                                                                | S7-10              |
| 7. Participant knowledge of the interviewer    | What did the participants know about the researcher? e.g. personal goals, reasons for doing the research                                   | Page 13 and S7-8   |
| 8. Interviewer characteristics                 | What characteristics were reported about the inter viewer/facilitator? e.g. Bias, assumptions, reasons and interests in the research topic | Page 12            |

|                                          |                                                                                                                                                          |                    |
|------------------------------------------|----------------------------------------------------------------------------------------------------------------------------------------------------------|--------------------|
| <b>Domain 2: study design</b>            |                                                                                                                                                          |                    |
| <i>Theoretical framework</i>             |                                                                                                                                                          |                    |
| 9. Methodological orientation and Theory | What methodological orientation was stated to underpin the study? e.g. grounded theory, discourse analysis, ethnography, phenomenology, content analysis | Page 8             |
| <i>Participant selection</i>             |                                                                                                                                                          |                    |
| 10. Sampling                             | How were participants selected? e.g. purposive, convenience, consecutive, snowball                                                                       | Page 6             |
| 11. Method of approach                   | How were participants approached? e.g. face-to-face, telephone, mail, email                                                                              | Page 6             |
| 12. Sample size                          | How many participants were in the study?                                                                                                                 | Page 6             |
| 13. Non-participation                    | How many people refused to participate or dropped out? Reasons?                                                                                          | Page 35            |
| <i>Setting</i>                           |                                                                                                                                                          |                    |
| 14. Setting of data collection           | Where was the data collected? e.g. home, clinic, workplace                                                                                               | Page 12            |
| 15. Presence of non-participants         | Was anyone else present besides the participants and researchers?                                                                                        | No                 |
| 16. Description of sample                | What are the important characteristics of the sample? e.g. demographic data, date                                                                        | Page 6<br>S1 Table |
| <i>Data collection</i>                   |                                                                                                                                                          |                    |
| 17. Interview guide                      | Were questions, prompts, guides provided by the authors? Was it pilot tested?                                                                            | Appendix 7-8       |
| 18. Repeat interviews                    | Were repeat inter views carried out? If yes, how many?                                                                                                   | x                  |
| 19. Audio/visual recording               | Did the research use audio or visual recording to collect the data?                                                                                      | Page 12            |
| 20. Field notes                          | Were field notes made during and/or after the inter view or focus group?                                                                                 | Page 12            |
| 21. Duration                             | What was the duration of the inter views or focus group?                                                                                                 | Page 28            |

|                                        |                                                                                                                                 |         |
|----------------------------------------|---------------------------------------------------------------------------------------------------------------------------------|---------|
|                                        |                                                                                                                                 |         |
| 22. Data saturation                    | Was data saturation discussed?                                                                                                  | Page 6  |
| 23. Transcripts returned               | Were transcripts returned to participants for comment and/or correction?                                                        | x       |
| <b>Domain 3: analysis and findings</b> |                                                                                                                                 |         |
| <i>Data analysis</i>                   |                                                                                                                                 |         |
| 24. Number of data coders              | How many data coders coded the data?                                                                                            | Page 2  |
| 25. Description of the coding tree     | Did authors provide a description of the coding tree?                                                                           | no      |
| 26. Derivation of themes               | Were themes identified in advance or derived from the data?                                                                     | no      |
| 27. Software                           | What software, if applicable, was used to manage the data?                                                                      | Page 13 |
| 28. Participant checking               | Did participants provide feedback on the findings?                                                                              | no      |
| <i>Reporting</i>                       |                                                                                                                                 |         |
| 29. Quotations presented               | Were participant quotations presented to illustrate the themes/findings? Was each quotation identified? e.g. participant number | yes     |
| 30. Data and findings consistent       | Was there consistency between the data presented and the findings?                                                              | yes     |
| 31. Clarity of major themes            | Were major themes clearly presented in the findings?                                                                            | yes     |
| 32. Clarity of minor themes            | Is there a description of diverse cases or discussion of minor themes?                                                          | yes     |

Tong A, Sainsbury P, Craig J. Consolidated criteria for reporting qualitative research (COREQ): a 32-item checklist for interviews and focus groups. *International Journal for Quality in Health Care*. 2007. Volume 19, Number 6: pp. 349 – 357

| Researchers       | Credentials | Occupation                                                                   | Gender | Experiences |
|-------------------|-------------|------------------------------------------------------------------------------|--------|-------------|
| Janneke Fischer   | BSc         | Master student Biomedical Sciences, VU-University Amsterdam                  | Female | Medium      |
| Benita Jansen     | BSc         | Master student International Public Health, VU-University Amsterdam          | Female | Medium      |
| Alberto Rivera    | MD PhD      | Head of South American Affaires of the DAHW                                  | Male   | High        |
| Libardo J. Gómez  | MD          | Coordinator at the DAHW, Medical consultant                                  | Male   | High        |
| Martha C. Barbosa | -           | Social worker at the DAHW, research supporter                                | Female | High        |
| Jorge L. Bilbao   | MD          | Head of Faculty of Health Sciences at University Metropolitana, Barranquilla | Male   | High        |
| José M. González  | BSc         | Master student Medicine at University Metropolitana, Barranquilla            | Male   | Low         |
| Luis Restrepo     | BSc         | Master student Medicine at University Metropolitana, Barranquilla            | Male   | Low         |
| Yesenia Vidal     | PhD         | PhD, head of Molecular Biology at University Metropolitana, Barranquilla     | Female | High        |
| Ruth M. H. Peters | PhD         | Postdoc and lecturer at VU University, Amsterdam                             | Female | High        |
